# Supplementary material
Source: bioRxiv or medRxiv preprint supplement (https://www.biorxiv.org/highwire/filestream/27190/field_highwire_adjunct_files/13/094060-5.pdf)

ChiP (Lin et al. 2013 )

non-ChiP (Ye and Zhong 2015)

Overlap (ChiP and non.ChiP)

PtSND1s

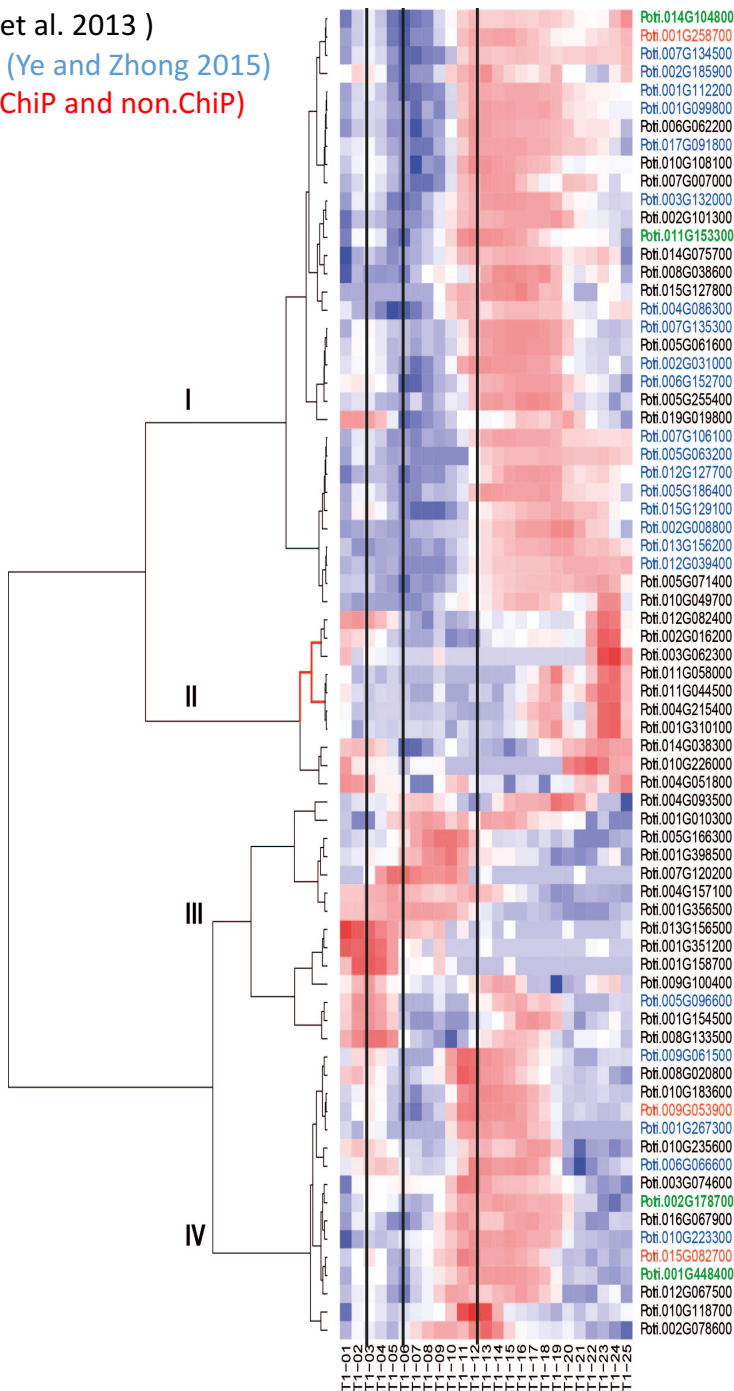

Supplement: Supplementary file [file 094060-5.pdf]
